# Supplementary material
Source: PubMed Central journal article supplement (PMC4502810)
Supplement: kaup-11-01-984277-s005.pdf [file kaup-11-01-984277-s005.pdf]

## Supplemental Materials to:

Oliver Florey, Noor Gammoh, Sung Eun Kim, Xuejun Jiang, Michael Overholtzer

## V-ATPase and osmotic imbalances activate endolysosomal LC3 lipidation

### Inventory of Supplemental Materials

#### Supplemental Figures 1 to 5

Figure S1, related to Figure 1. Effect of lysosome inhibitors on lysosomal pH and canonical autophagy deficiency in *atg13*<sup>-/-</sup> MEFs.

Figure S2, related to Figure 1. Repeat western blots and quantification of LC3 lipidation.

Figure S3, related to Figure 2. Quantification of GFP-LC3 recruitment to phagosomes and entotic corpse vacuoles and effects of V-ATPase inhibitors Baf and ConA; measurement of GFP-LC3 dynamics during chloroquine-mediated GFP-LC3 recruitment to entotic corpse vacuole.

Figure S4, related to Figure 3. Inhibition of canonical autophagy and disruption of 2xFYVE-mCherry localization by PtdIns 3-kinase inhibitors.

Figure S5, related to Figure 5. GFP-LC3 localization following osmotic swelling of entotic vacuoles containing live and dead cells.

#### Supplemental Movies 1 to 4

Movie S1. GFP-LC3 and LAMP1-RFP expressing MCF10A cell containing an entotic corpse treated with chloroquine (100  $\mu$ M).

Movie S2. LAMP1-GFP expressing MCF10A cell treated with chloroquine (100  $\mu$ M).

43 Movie S3. GFP-LC3 and LAMP1-RFP expressing MCF10A cell containing an  
44 entotic corpse treated with hypotonic media.  
45  
46 Movie S4. GFP-LC3 and LAMP1-RFP expressing MCF10A treated with  
47 hypotonic media.  
48

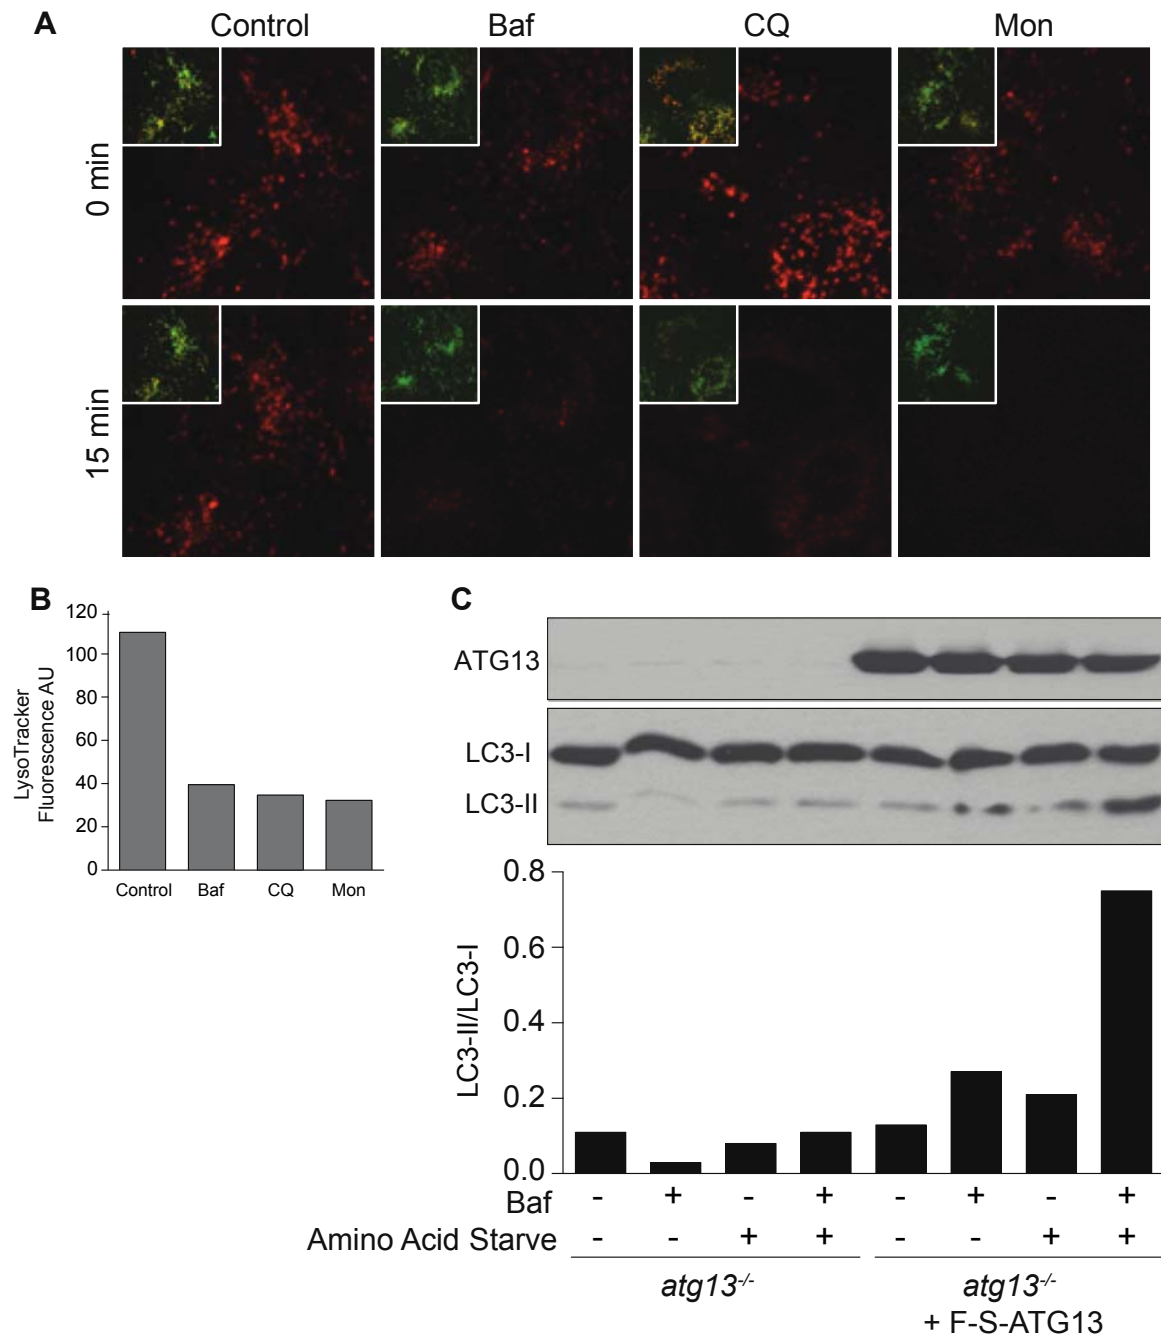

**Figure S1, related to Figure 1.** Effect of lysosome inhibitors on lysosomal pH and canonical autophagy deficiency in *atg13*<sup>-/-</sup> MEFs. **(A)** Confocal images of MCF10A cells expressing LAMP1-GFP and stained with LysoTracker Red at time 0 or 15 min after treatment with Baf (100 nM), CQ (100  $\mu$ M) or Mon (100  $\mu$ M). Main panels show LysoTracker Red signal; insets show LAMP1-GFP and LysoTracker Red merge. **(B)** Quantification of LysoTracker Red intensity in LAMP1-GFP compartments from experiment described in **(A)**. **(C)** Western blot analysis of ATG13 and LC3 in *atg13*<sup>-/-</sup> MEFs and *atg13*<sup>-/-</sup> MEFs rescued with wild-type ATG13, following treatment with Baf (100 nM), 30 min amino acid starvation or both.

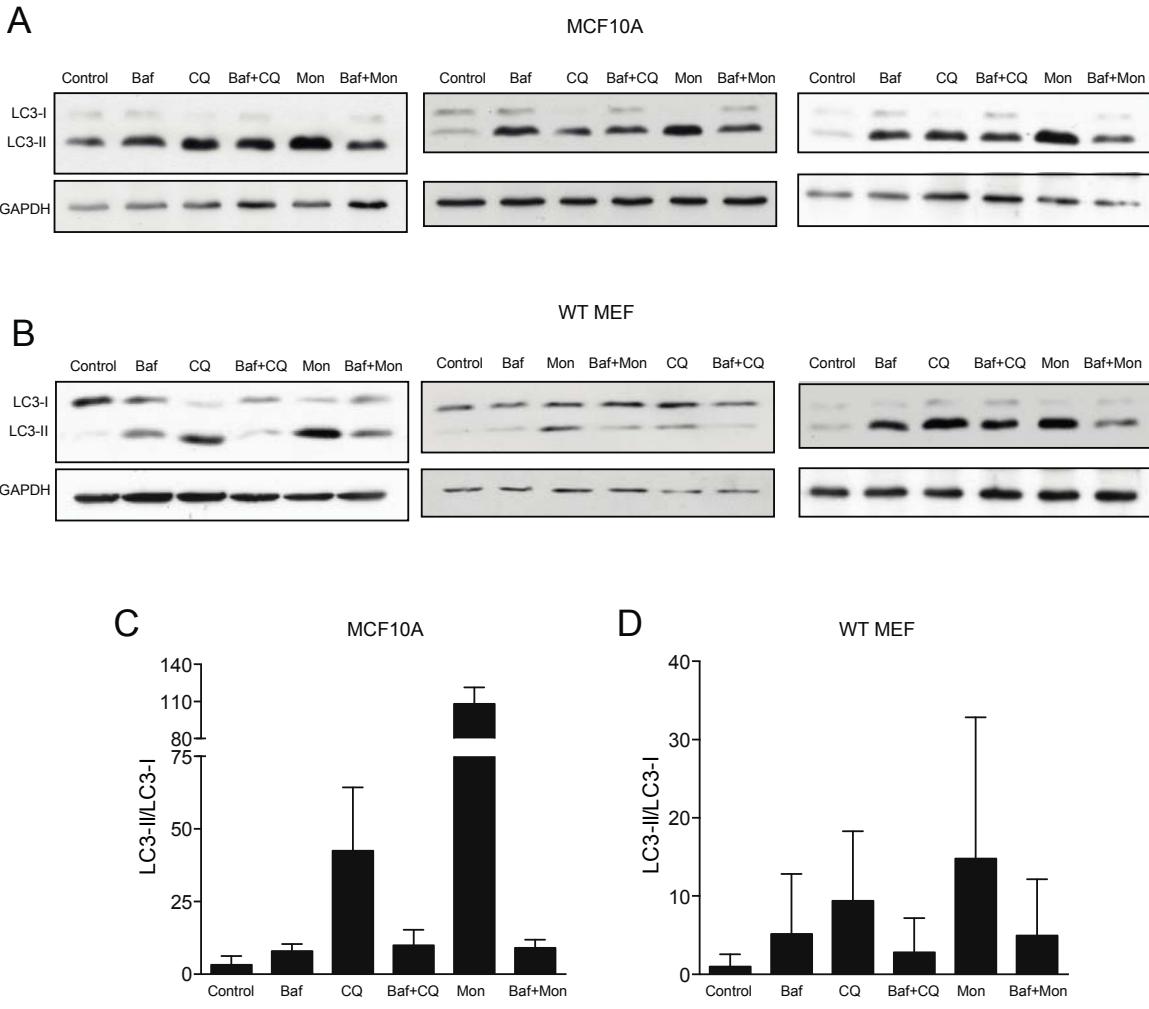

**Figure S2, related to Figure 1.** Quantification of LC3 western blots. (A and B) 3 separate experiments showing western blot images of LC3 and GAPDH following treatment with Baf (100 nM) Chloroquine (100  $\mu$ M) or Monensin (100  $\mu$ M) with or without 15 min pretreatment with Baf in (A) MCF10A cells and (B) wild-type MEFs. (C and D) Quantification of LC3-II/LC3-I ratios from blots in (A and B). Data represent mean  $\pm$  standard deviation from 3 experiments.

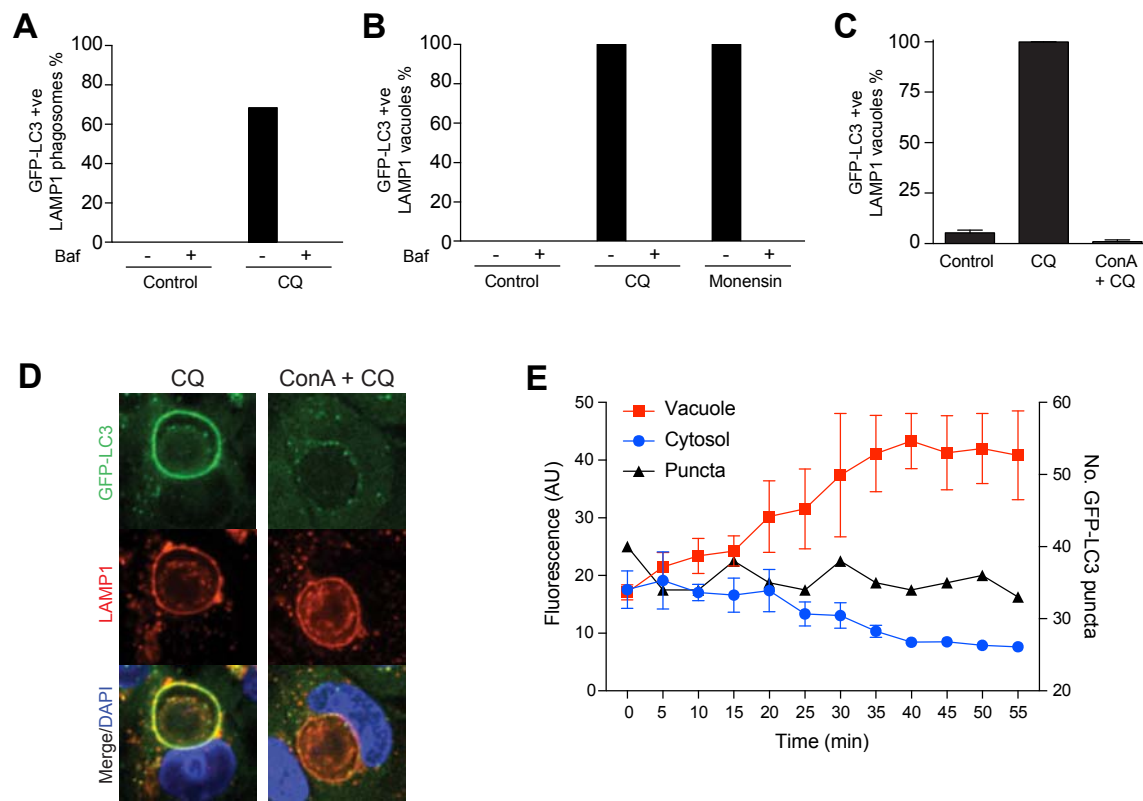

**Figure S3, related to Figure 2.** Quantification of GFP-LC3 recruitment to phagosomes and entotic corpse vacuoles and effects of V-ATPase inhibitors Baf and ConA; measurement of GFP-LC3 dynamics during chloroquine-mediated GFP-LC3 recruitment to entotic corpse vacuole. **(A)** Quantification of GFP-LC3 recruitment to uncoated-latex bead LAMP1-positive phagosomes in J774 cells following treatment with CQ (100  $\mu$ M) with or without Baf (100 nM). **(B)** Quantification of GFP-LC3 recruitment to LAMP1-positive entotic corpse vacuoles in MCF10A cells following treatment with CQ (100  $\mu$ M), Mon (100  $\mu$ M) with or without Baf (100 nM) or ConA (100 nM). Data represent mean  $\pm$  SEM from 3 separate experiments. **(C)** Quantification of GFP-LC3 recruitment to LAMP1-positive entotic corpse vacuoles in MCF10A cells following treatment with CQ (100  $\mu$ M) with or without ConA (100 nM). Data represent mean  $\pm$  SEM from 3 separate experiments. **(D)** Confocal mages of GFP-LC3 and LAMP1 on entotic corpse vacuoles in MCF10A cells treated with CQ or ConA (100 nM) + CQ for 1 h. **(E)** Analysis of GFP-LC3 intensity, left y-axis, through time in the cytosol and on the membrane of an entotic corpse vacuole. Error bars represent the SD of 3 separate measurements at each time point. Number of GFP-LC3 puncta (autophagosomes) measured and plotted on the right y-axis at each time point.

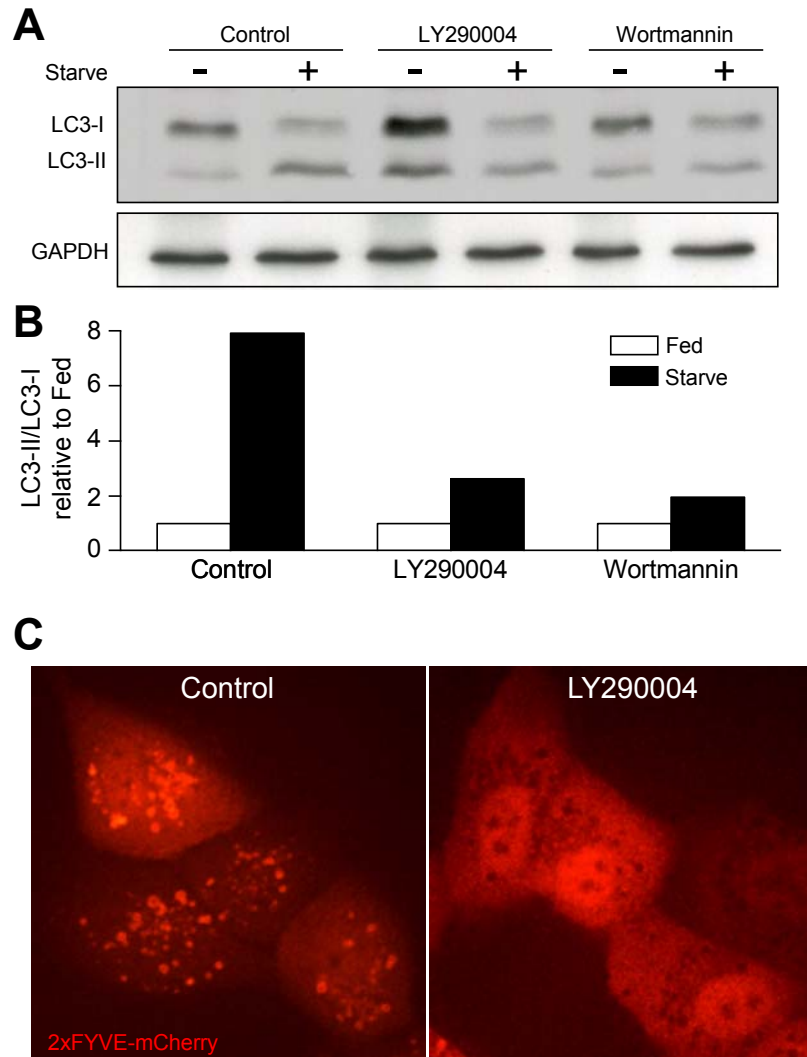

**Figure S4, related to Figure 3.** Inhibition of canonical autophagy and disruption of 2xFYVE-mCherry localization by PtdIns 3-kinase inhibitors. **(A)** Western blot analysis of LC3 in MCF10 cells in full media or amino acid starvation for 3 h with or without LY290004 (25  $\mu$ M) or wortmannin (200 nM). **(B)** Quantification of LC3-II/LC3-I fold changes between fed and starved conditions. **(C)** Confocal images of MCF10A cells expressing a 2xFYVE-mCherry construct that labels PtdIns3P-positive membranes in the presence and absence of LY290004 (25  $\mu$ M).

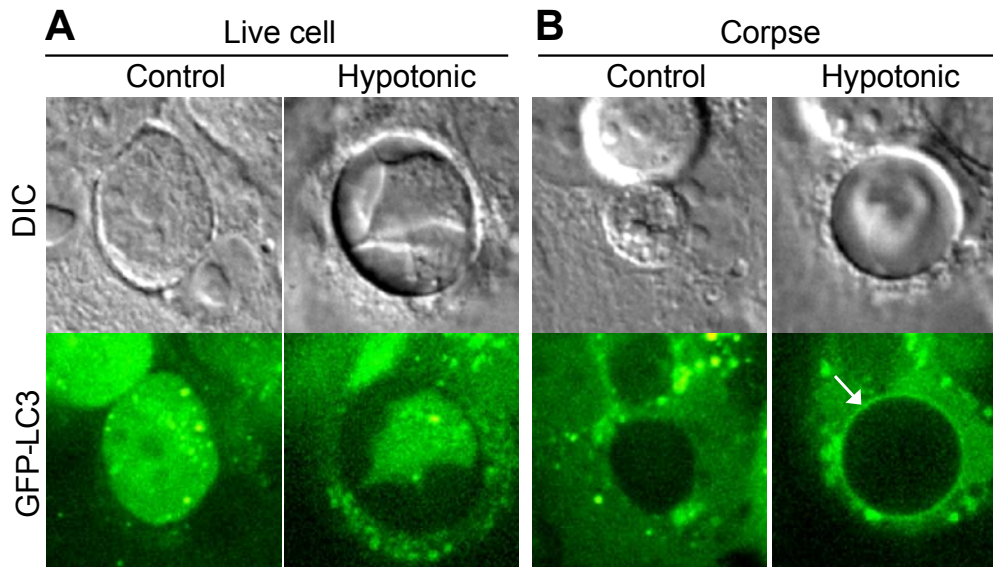

**Figure S5, related to Figure 5.** GFP-LC3 localization following osmotic swelling of entotic vacuoles containing live and dead cells. Confocal images of DIC and GFP-LC3 in MCF10A cell-in-cell structures containing (A) a live cell or (B) a corpse, before and after treatment with hypotonic media. Note both entotic vacuole swells, but GFP-LC3 only recruits to the corpse containing vacuole (arrow).
